# Supplementary material
Source: PubMed Central journal article supplement (PMC7002016)
Supplement: NIHMS855200-supplement-1.pdf [file NIHMS855200-supplement-1.pdf]

**Supplemental Table 1.** Unadjusted prevalence and multivariate-adjusted odds ratios for celiac disease and PWAG among NHANES participants **20+ years** (N=15,823), United States, 2009-2014

|                    | Celiac disease |                           |                        |            | PWAG |                           |                        |           |
|--------------------|----------------|---------------------------|------------------------|------------|------|---------------------------|------------------------|-----------|
|                    | N              | Unadjusted prevalence (%) | Multivariate-adjusted* |            | N    | Unadjusted prevalence (%) | Multivariate-adjusted* |           |
|                    |                |                           | OR†                    | 95% CI     |      |                           | OR†                    | 95% CI    |
| Total population   | 79             | 0.71                      | --                     | --         | 184  | 1.23                      | --                     | --        |
| Latitude (°N)      |                |                           |                        |            |      |                           |                        |           |
| <35                | 7              | 0.12                      | 1.0                    |            | 51   | 0.90                      | 1.0                    |           |
| 35-<40             | 21             | 0.64 <sup>1</sup>         | 4.87                   | 1.70-13.94 | 49   | 0.78                      | 0.77                   | 0.44-1.35 |
| ≥40                | 51             | 1.13 <sup>1</sup>         | 7.20                   | 2.66-19.46 | 84   | 1.77 <sup>1,2</sup>       | 1.81                   | 1.04-3.17 |
| Age (years)        |                |                           |                        |            |      |                           |                        |           |
| 20-39              | 26             | 0.70                      | 1.0                    |            | 63   | 1.27                      | 1.0                    |           |
| 40-59              | 28             | 0.70                      | 0.94                   | 0.51-1.74  | 67   | 1.34                      | 1.01                   | 0.58-1.74 |
| ≥60                | 25             | 0.75                      | 1.02                   | 0.51-2.04  | 54   | 1.01                      | 0.78                   | 0.39-1.57 |
| Sex                |                |                           |                        |            |      |                           |                        |           |
| Men                | 33             | 0.59                      | 1.0                    |            | 80   | 0.92                      | 1.0                    |           |
| Women              | 46             | 0.82                      | 1.28                   | 0.76-2.17  | 104  | 1.53 <sup>1</sup>         | 1.73                   | 1.19-2.52 |
| Race-ethnicity     |                |                           |                        |            |      |                           |                        |           |
| Non-Hispanic white | 57             | 0.94                      | 1.0                    |            | 75   | 1.27                      | 1.0                    |           |
| Non-Hispanic black | 5              | 0.14 <sup>1</sup>         | 0.22                   | 0.07-0.67  | 44   | 1.29                      | 1.39                   | 0.87-2.22 |
| Hispanic           | 11             | 0.28 <sup>1</sup>         | 0.71                   | 0.28-1.81  | 33   | 0.88                      | 1.06                   | 0.61-1.83 |
| Other              | 6              | 0.30 <sup>1</sup>         | 0.35                   | 0.11-1.09  | 32   | 1.46                      | 1.22                   | 0.65-2.32 |
| Education (years)  |                |                           |                        |            |      |                           |                        |           |
| <12                | 8              | 0.23                      | 0.36                   | 0.16-0.83  | 28   | 0.82                      | 0.81                   | 0.40-1.64 |
| 12                 | 13             | 0.38                      | 0.48                   | 0.25-0.93  | 30   | 0.78                      | 0.61                   | 0.32-1.16 |
| >12                | 58             | 0.96 <sup>1,2</sup>       | 1.0                    |            | 125  | 1.50 <sup>1,2</sup>       | 1.0                    |           |
| Income‡            |                |                           |                        |            |      |                           |                        |           |
| PIR 0-<1.7         | 25             | 0.58                      | 1.02                   | 0.51-2.03  | 57   | 0.81                      | 0.48                   | 0.28-0.83 |

|                          |    |                   |      |           |    |                   |      |           |
|--------------------------|----|-------------------|------|-----------|----|-------------------|------|-----------|
| PIR 1.7-<4.0             | 22 | 0.62              | 0.85 | 0.45-1.59 | 52 | 1.20              | 0.76 | 0.43-1.34 |
| PIR ≥4.0                 | 28 | 0.97              | 1.0  |           | 60 | 1.69 <sup>1</sup> | 1.0  |           |
| BMI (kg/m <sup>2</sup> ) |    |                   |      |           |    |                   |      |           |
| <25                      | 35 | 1.13              | 1.0  |           | 76 | 1.78              | 1.0  |           |
| 25-<30                   | 20 | 0.62 <sup>1</sup> | 0.52 | 0.29-0.94 | 45 | 0.96 <sup>1</sup> | 0.59 | 0.36-0.99 |
| ≥30                      | 22 | 0.44 <sup>1</sup> | 0.45 | 0.23-0.88 | 58 | 0.99 <sup>1</sup> | 0.65 | 0.42-0.99 |

PWAG, people without celiac disease avoiding gluten; NHANES, National Health and Nutrition Examination Survey; OR, odds ratio; CI, confidence interval; PIR, poverty income ratio; BMI, body mass index.

<sup>1</sup>p<0.05 compared with first-listed group.

<sup>2</sup>p<0.05 compared with second-listed group.

\*Adjusted for all other factors listed (N=14,317).

†Estimated using logistic regression analysis.

‡PIR is family income to poverty threshold ratio. Cut-points were tertiles.

**Supplemental Table 2.** Unadjusted prevalence and multivariate-adjusted odds ratios for celiac disease and PWAG substituting region for latitude among NHANES participants 6+ years (N=22,277), United States, 2009-2014

|                    | Celiac disease |                           |                        |           | PWAG |                           |                       |           |
|--------------------|----------------|---------------------------|------------------------|-----------|------|---------------------------|-----------------------|-----------|
|                    | N              | Unadjusted prevalence (%) | Multivariate-adjusted* |           | N    | Unadjusted prevalence (%) | Multivariate-adjusted |           |
|                    |                |                           | OR†                    | 95% CI    |      |                           | OR                    | 95% CI    |
| Total population   | 109            | 0.72                      | --                     | --        | 213  | 1.11                      | --                    | --        |
| Region             |                |                           |                        |           |      |                           |                       |           |
| Northeast          | 30             | 1.11                      | 2.28                   | 1.11-4.71 | 48   | 1.88                      | 2.86                  | 1.61-5.07 |
| Midwest            | 26             | 0.94                      | 1.79                   | 0.84-3.79 | 39   | 0.97                      | 1.49                  | 0.64-3.43 |
| South              | 22             | 0.37 <sup>1,2</sup>       | 1.0                    |           | 71   | 0.63 <sup>1</sup>         | 1.0                   |           |
| West               | 31             | 0.70                      | 1.76                   | 0.76-4.12 | 55   | 1.36                      | 2.46                  | 1.27-4.76 |
| Age (years)        |                |                           |                        |           |      |                           |                       |           |
| 6-19               | 30             | 0.74                      | 0.86                   | 0.53-1.38 | 29   | 0.60                      | 0.48                  | 0.27-0.84 |
| 20-39              | 26             | 0.70                      | 1.0                    |           | 63   | 1.27 <sup>1</sup>         | 1.0                   |           |
| 40-59              | 28             | 0.70                      | 0.93                   | 0.50-1.76 | 67   | 1.34 <sup>1</sup>         | 1.02                  | 0.60-1.76 |
| ≥60                | 25             | 0.75                      | 0.96                   | 0.48-1.90 | 54   | 1.01                      | 0.75                  | 0.37-1.51 |
| Sex                |                |                           |                        |           |      |                           |                       |           |
| Male               | 40             | 0.55                      | 1.0                    |           | 95   | 0.83                      | 1.0                   |           |
| Female             | 69             | 0.88                      | 1.51                   | 0.94-2.44 | 118  | 1.38 <sup>1</sup>         | 1.71                  | 1.17-2.48 |
| Race-ethnicity     |                |                           |                        |           |      |                           |                       |           |
| Non-Hispanic white | 75             | 0.97                      | 1.0                    |           | 84   | 1.18                      | 1.0                   |           |
| Non-Hispanic black | 6              | 0.12 <sup>1</sup>         | 0.17                   | 0.06-0.46 | 53   | 1.13                      | 1.32                  | 0.85-2.05 |
| Hispanic           | 19             | 0.31 <sup>1</sup>         | 0.46                   | 0.21-1.02 | 43   | 0.80                      | 0.86                  | 0.53-1.39 |
| Other              | 9              | 0.28 <sup>1</sup>         | 0.27                   | 0.10-0.75 | 33   | 1.17                      | 0.93                  | 0.48-1.79 |
| Education (years)‡ |                |                           |                        |           |      |                           |                       |           |
| <12                | 15             | 0.32                      | 0.54                   | 0.24-1.21 | 35   | 0.74                      | 0.76                  | 0.39-1.48 |
| 12                 | 17             | 0.37                      | 0.53                   | 0.27-1.01 | 35   | 0.73                      | 0.62                  | 0.34-1.14 |
| >12                | 77             | 0.95 <sup>1,2</sup>       | 1.0                    |           | 142  | 1.35 <sup>1,2</sup>       | 1.0                   |           |

|               |    |                   |      |           |    |                   |      |           |
|---------------|----|-------------------|------|-----------|----|-------------------|------|-----------|
| Income§       |    |                   |      |           |    |                   |      |           |
| PIR 0-<1.7    | 40 | 0.57              | 0.97 | 0.53-1.78 | 75 | 0.78              | 0.63 | 0.36-1.11 |
| PIR 1.7-<4.0  | 28 | 0.62              | 0.80 | 0.48-1.33 | 59 | 1.11              | 0.86 | 0.50-1.48 |
| PIR ≥4.0      | 35 | 1.01              | 1.0  |           | 64 | 1.52 <sup>1</sup> | 1.0  |           |
| BMI           |    |                   |      |           |    |                   |      |           |
| Normal weight | 60 | 1.08              | 1.0  |           | 89 | 1.32              | 1.0  |           |
| Overweight    | 23 | 0.60 <sup>1</sup> | 0.52 | 0.30-0.91 | 51 | 0.94              | 0.68 | 0.40-1.15 |
| Obese         | 24 | 0.42 <sup>1</sup> | 0.44 | 0.22-0.85 | 68 | 1.02              | 0.80 | 0.53-1.20 |

PWAG, people without celiac disease avoiding gluten; NHANES, National Health and Nutrition Examination Survey; OR, odds ratio; CI, confidence interval; PIR, poverty income ratio; BMI, body mass index.

<sup>1</sup>p<0.05 compared with first-listed group.

<sup>2</sup>p<0.05 compared with second-listed group.

\*Adjusted for all other factors listed (N=20,178).

†Estimated using logistic regression analysis.

‡For persons 6-19 years, education level was the higher of the household reference person or that person's spouse.

§PIR is family income to poverty threshold ratio. Cut-points were tertiles.

||For persons 6-19 years, BMI was defined in age- and sex-specific percentiles as normal weight, <85<sup>th</sup>, overweight, 85<sup>th</sup>-<95<sup>th</sup>, and obese, ≥95<sup>th</sup>; for persons 20+ years, BMI was defined in kg/m<sup>2</sup> as normal weight, <25, overweight, 25-<30, and obese, ≥30.
